# Supplementary material for: Magnetoresistance in Co/2D MoS2/Co and Ni/2D MoS2/Ni junctions
Source: Royal Society of Chemistry journal article supplement (doi:10.1039/c6cp01866a), 2016-01-01
Supplement: c6cp01866a1.pdf [file c6cp01866a1.pdf]

## Supporting Information

### Magnetoresistance in Co/2D MoS<sub>2</sub>/Co and Ni/2D MoS<sub>2</sub>/Ni junctions

Han Zhang<sup>1, †</sup>, Meng Ye<sup>1, †</sup>, Yangyang Wang<sup>1</sup>, Ruge Quhe<sup>1,4</sup>, Yuanyuan Pan<sup>1</sup>, Ying Guo<sup>3</sup>,  
Zhigang Song<sup>1</sup>, Jinbo Yang<sup>1,2</sup>, Wanlin Guo<sup>5</sup>, and Jing Lu<sup>1,2,\*</sup>

<sup>1</sup>State Key Laboratory of Mesoscopic Physics and Department of Physics,  
Peking University, Beijing 100871, P. R. China

<sup>2</sup>Collaborative Innovation Center of Quantum Matter, Beijing 100871, P. R. China

<sup>3</sup>School of Physics and Telecommunication Engineering, Shaanxi University of  
Technology, Hanzhong 723001, P. R. China

<sup>4</sup>State Key Laboratory of Information Photonics and Optical Communications &  
School of Science, Beijing University of Posts and Telecommunications, Beijing 100876,  
China

<sup>5</sup>Key Laboratory for Intelligent Nano Materials and Devices of the Ministry of Education,  
P. R. China

<sup>†</sup>These authors contributed equally to this work.

\*Address correspondence to: [jinglu@pku.edu.cn](mailto:jinglu@pku.edu.cn)

Ni(fcc)/SL-MoS<sub>2</sub>/Ni(fcc)

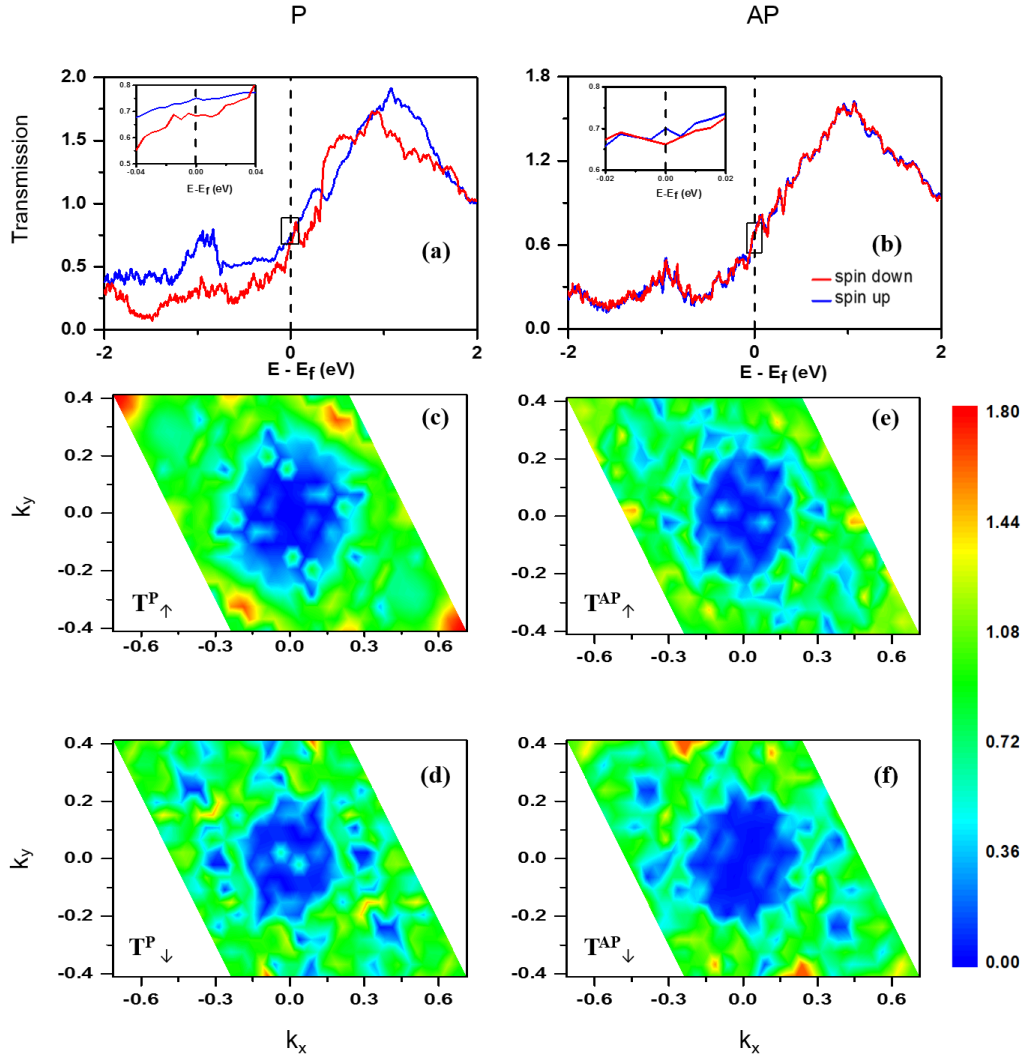

**Figure S1.** (a,b) Spin-resolved transmission spectra of the Ni(fcc)/SL-MoS<sub>2</sub>/Ni(fcc) junction in the P (a) and AP (b) configurations. Inset: Zoom-in of a region near  $E_f$ . (c,d)  $k$ -resolved and spin-resolved transmission coefficients at the Fermi level for the spin-up channel in the P (c) and AP (d) configurations. (e,f) Same as (c,d) but for the spin-down channel.

Co(hcp)/3-L-MoS<sub>2</sub>/Co(hcp)

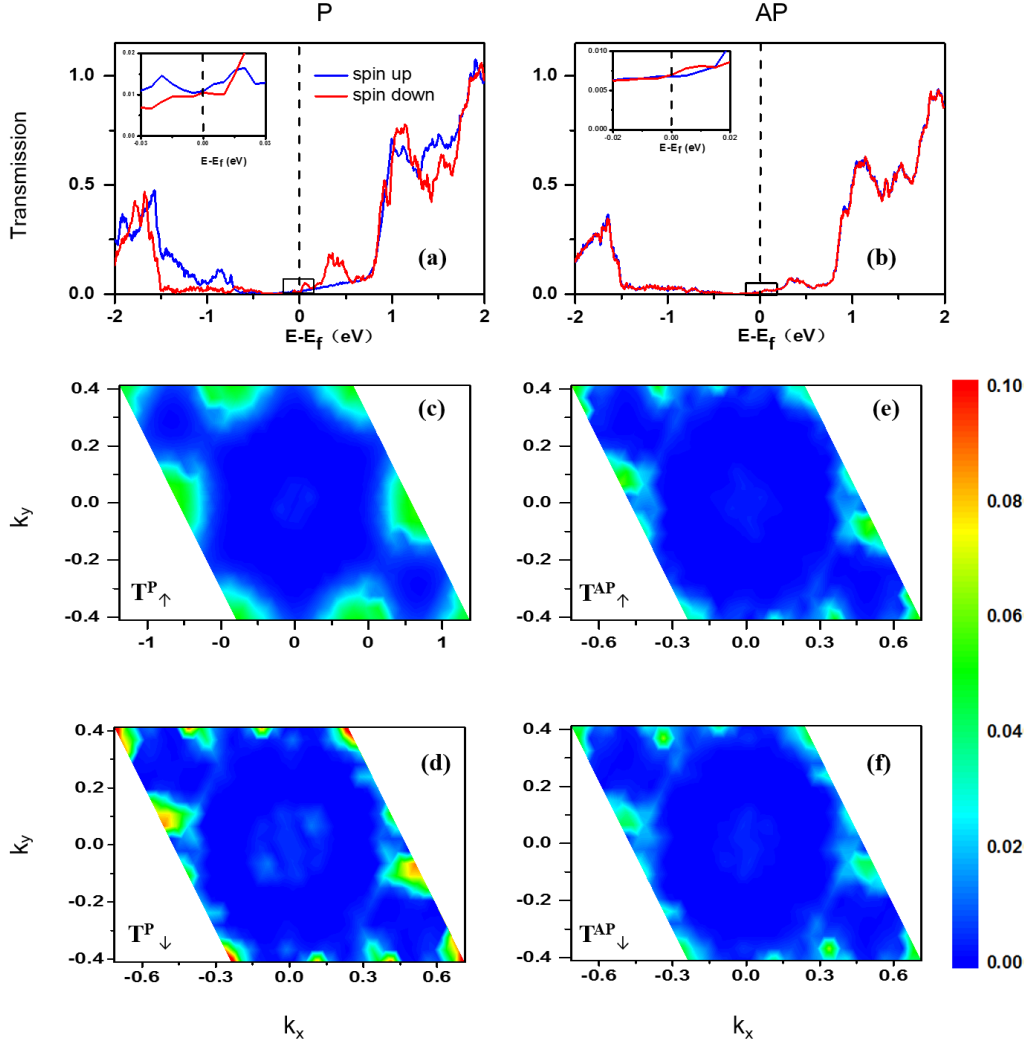

**Figure S2.** (a,b) Spin-resolved transmission spectra of the Co(hcp)/3-L-MoS<sub>2</sub>/Co(hcp) junction in the P (a) and AP (b) configurations. Inset: Zoom-in of a region near  $E_f$ . (c,d)  $k$ -resolved and spin-resolved transmission coefficients at the Fermi level for the spin-up channel in the P (c) and AP (d) configurations. (e,f) Same as (c,d) but for the spin-down channel.

Ni(fcc)/5-L-MoS<sub>2</sub>/Ni(fcc)

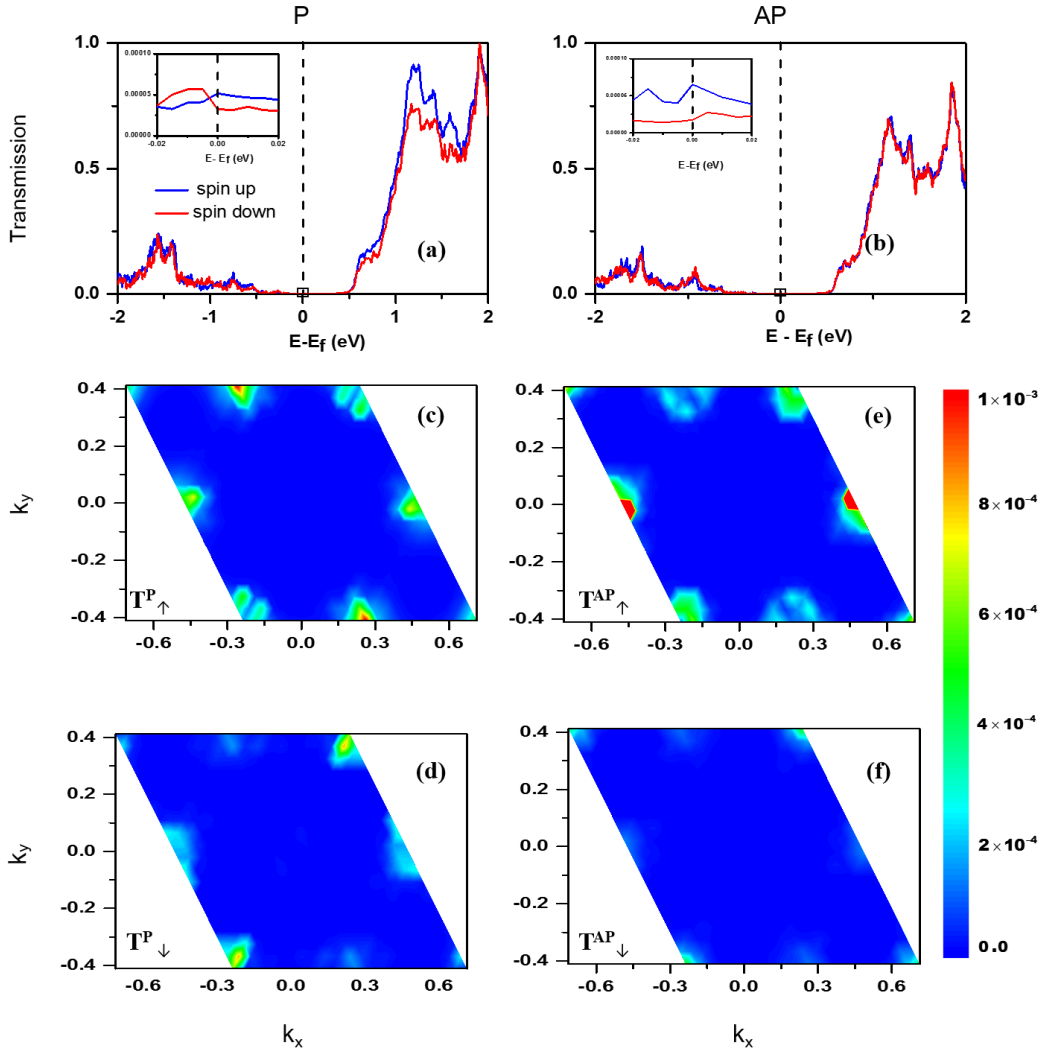

**Figure S3.** (a,b) Spin-resolved transmission spectra of the Ni(fcc)/5-L-MoS<sub>2</sub>/Ni(fcc) junction in the P (a) and AP (b) configurations. Inset: Zoom-in of a region near  $E_f$ . (c,d)  $k$ -resolved and spin-resolved transmission coefficients at the Fermi level for the spin-up channel in the P (c) and AP (d) configurations. (e,f) Same as (c,d) but for the spin-down channel.
